# Supplementary material
Source: PubMed Central journal article supplement (PMC6697001)
Supplement: NIHMS1532883-supplement-1.pdf [file NIHMS1532883-supplement-1.pdf]

**Cell Reports, Volume 27**

**Supplemental Information**

**Early Seizure Activity Accelerates Depletion of  
Hippocampal Neural Stem Cells and Impairs Spatial  
Discrimination in an Alzheimer's Disease Model**

**Chia-Hsuan Fu, Daniel Maxim Iascone, Iraklis Petrof, Anupam Hazra, Xiaohong Zhang, Mark S. Pyfer, Umberto Tosi, Brian F. Corbett, Jingli Cai, Jason Lee, Jin Park, Lorraine Iacovitti, Helen E. Scharfman, Grigori Enikolopov, and Jeannie Chin**

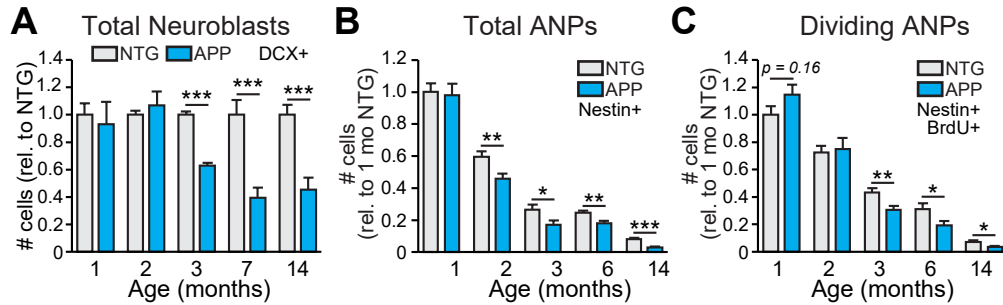

**Figure S1. The effects of seizures on neuroblasts and amplifying neural progenitors (ANPs). Related to Figures 1 and 2.**

(A) Optical density measurement of DCX at 1 month of age (n = 9-12 mice per genotype), and number of DCX+ neuroblasts at 2 (n = 6 mice per genotype), 3 (n = 8 mice per genotype), 7 (n = 9-10 mice per genotype), and 14 (n = 11-12 mice per genotype) months of age, normalized to NTG at each time point. Note that the 1 month time point is the same data as presented in Fig 1D.

(B) Numbers of Nestin+ ANPs were quantified in NTG and APP at 1 (n = 10-11 mice per genotype), 2 (n = 14 mice per genotype), 3 (n = 8 mice per genotype), 6 (n = 9-10 mice per genotype), and 14 (n = 11-12 mice per genotype) months of age. Cell counts are presented here as normalized to the average of 1-month-old NTG mice.

(C) Number of BrdU+ Nestin+ ANPs were quantified in NTG and APP mice at 1 (n = 9-10 mice per genotype), 2 (n = 8 mice per genotype), 3 (n = 8 mice per genotype), 6 (n = 8 mice per genotype), and 14 (n = 11-12 mice per genotype) months of age. Cell counts are presented here as normalized to the average of 1-month-old NTG mice.

\*p < 0.05; \*\*p < 0.01, \*\*\*p < 0.001, two-tailed unpaired Student's t-test comparing means between NTG and APP mice at each age (A-C).

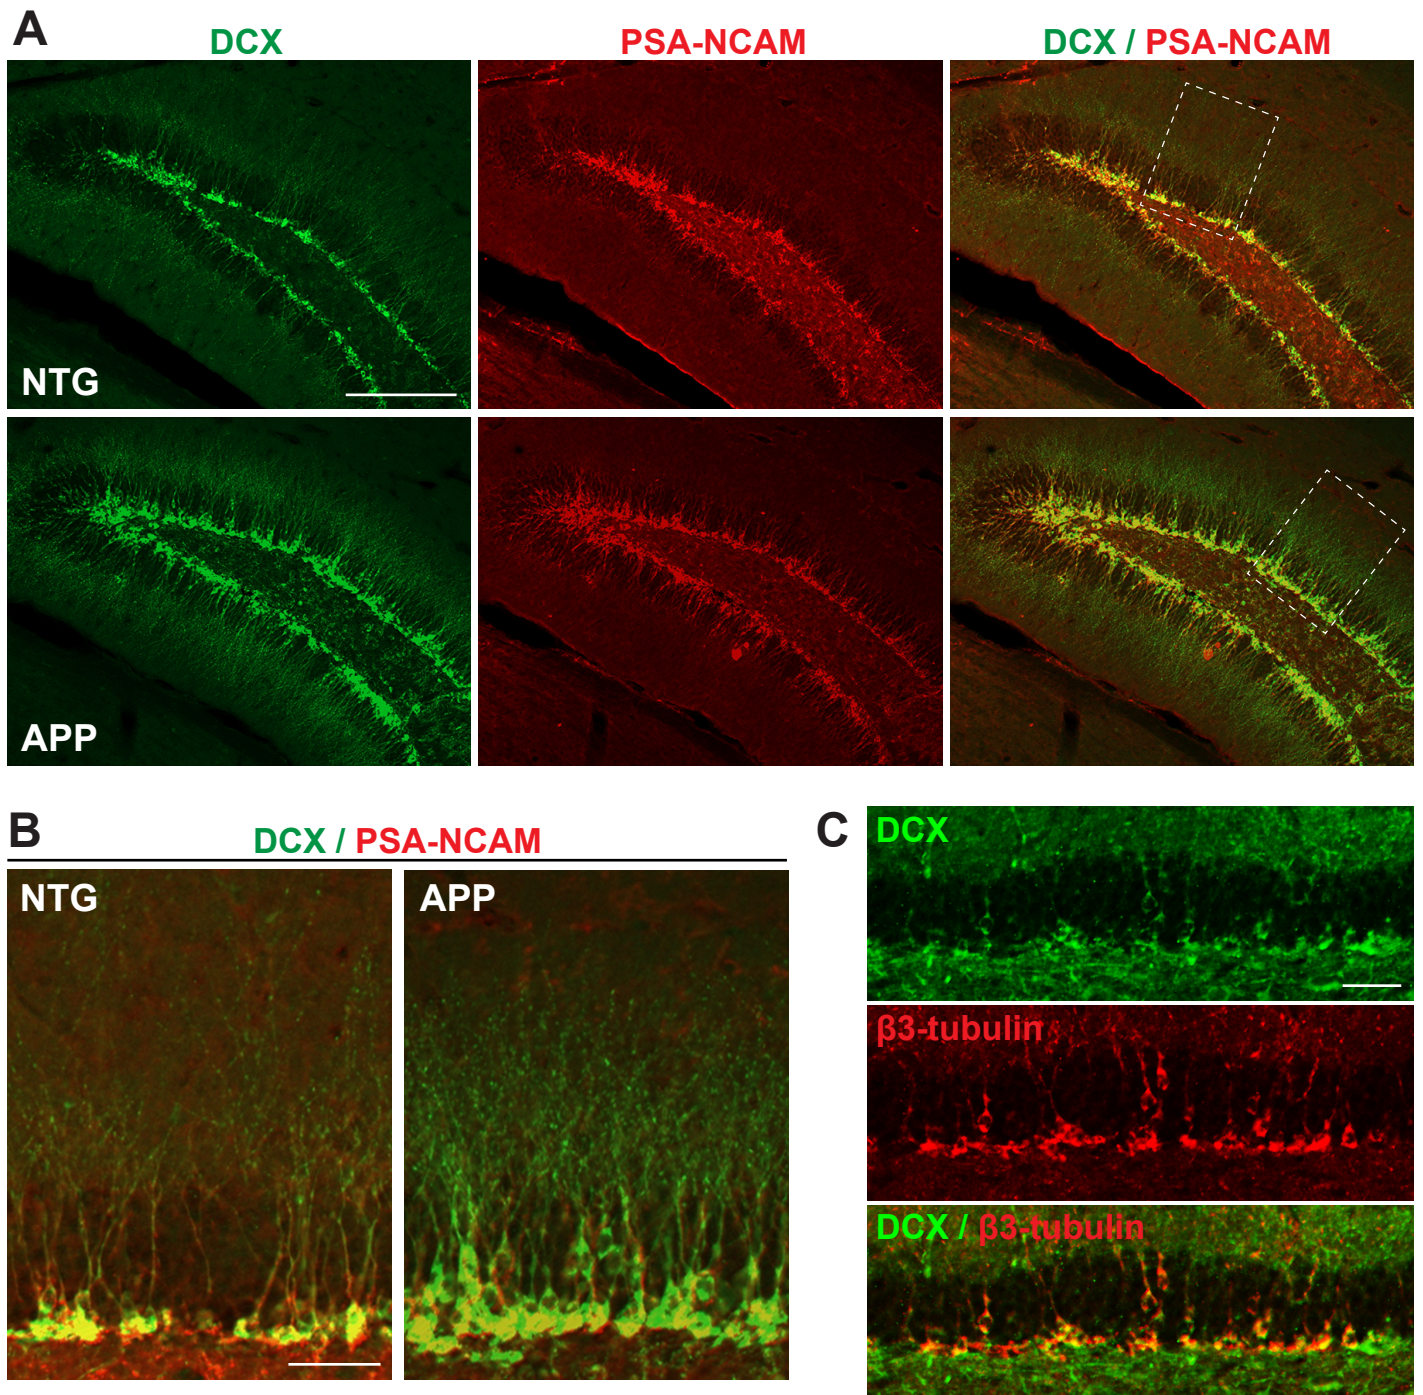

**Figure S2. Doublecortin-expressing cells in the dentate gyrus of NTG and APP mice also express PSA-NCAM and  $\beta$ 3-tubulin. Related to Figure 1.**

Coronal sections from mice at 2 months of age were immunostained.

(A) Doublecortin (green, left panels) is expressed in cell bodies and in dendritic processes, as is PSA-NCAM (red, middle panels). Overlaid images (right panels) reveal coexpression of doublecortin and PSA-NCAM (yellow) in neurons in the subgranular zone of NTG mice (top panels) and APP mice (bottom panels). Scale bar, 200 $\mu$ m.

(B) Inset of are indicated in overlaid images in A. Note that the increase in doublecortin- and PSA-NCAM-expressing neurons is evident at this age, consistent with findings in Figure 1 of the main paper. Scale bar, 50 $\mu$ m.

(C) Doublecortin-expressing cells (green, top panel) also express  $\beta$ 3-tubulin, a marker of neuronal cells (red, middle panel; see overlay, bottom panel). Scale bar, 50 $\mu$ m.

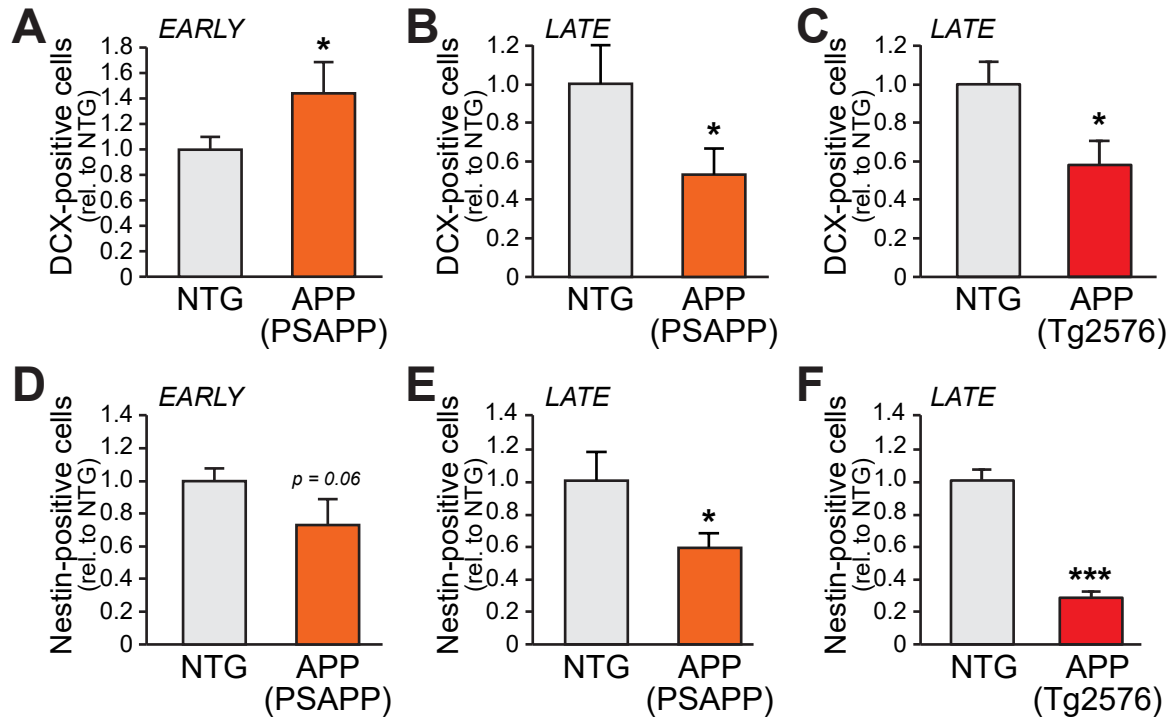

**Figure S3. The PSAPP and TG2576 lines of transgenic APP mice exhibit alterations in immature neurons and neural stem cells similar to J20 APP mice. Related to Figures 1 and 2.**

Brain sections from PSAPP mice at 5 months of age ( $n = 9-11$  mice per genotype) and 12 months of age ( $n = 11-12$  mice per genotype), and from Tg2576 mice at 10 months of age ( $n = 11$  mice per genotype) were immunostained for doublecortin and nestin. (A-B) Immunostaining of brain sections from PSAPP mice demonstrate increased number of DCX-expressing immature neurons at early disease stages (5 months of age, A) and decreased numbers at late disease stages (12 months of age, B) compared with age-matched controls.

(C) Tg2576 mice at late disease stages (10 months of age) also showed decreased DCX-expressing newborn neurons.

(D-E) PSAPP mice exhibit modest decreases in nestin-expressing neural stem cells at early disease stages (D) that further decrease at later disease stages (E).

(F) Tg2576 mice at late disease stages also show decreased Nestin-expressing neural stem cells compared with NTG controls.

For statistical analyses, one-tailed unpaired Student's t-tests were used since the hypothesis was that the direction of change in PSAPP and Tg2576 mice would mirror that observed in J20 mice in Figures 1 and 2, \* $p < 0.01$ , \*\*\*  $p < 0.001$ . Values indicate mean  $\pm$  SEM.

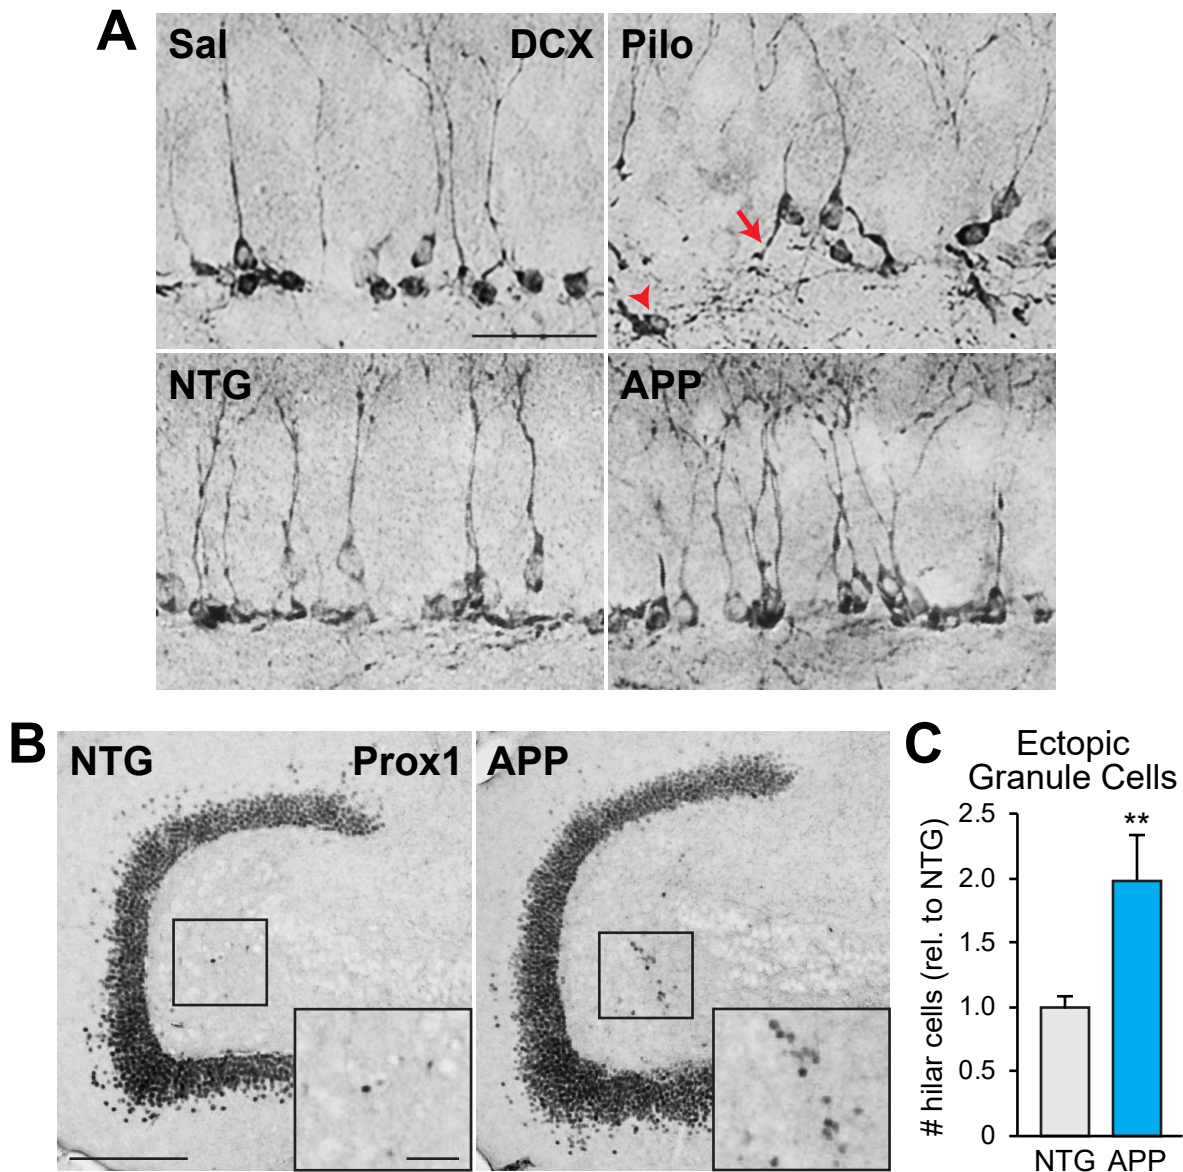

**Figure S4. Newborn neurons in APP mice exhibit normal morphology, but show increased ectopic migration into the hilus compared to NTG mice. Related to Figure 1.**

(A) Morphology of DCX+ cells is not obviously different between NTG and APP mice (3 months of age). In contrast, pilocarpine-treated wild-type mice (270-280 mg/kg, IP, 6 weeks post status epilepticus) showed altered neuronal polarity (arrow) and migration (arrowhead) compared to saline-treated mice. Scale bar, 50µm.

(B) APP mice show increased number of ectopic Prox1+ granule neurons in the hilus compared to NTG mice (6 months of age, n = 7-10 mice per genotype). Scale bar, 250µm, inset scale bar, 50µm.

\*\*p < 0.01, two-tailed unpaired Student's t-test. Values indicate mean ± SEM.

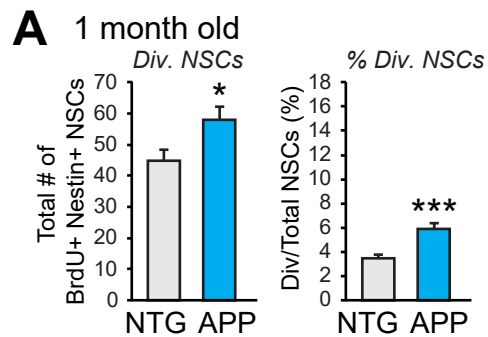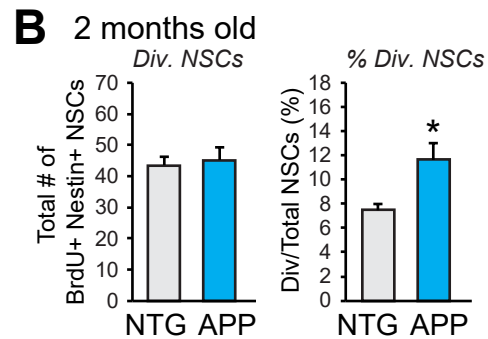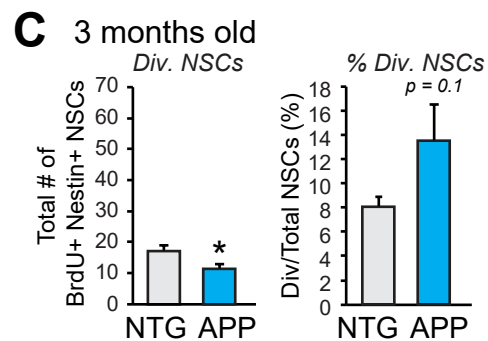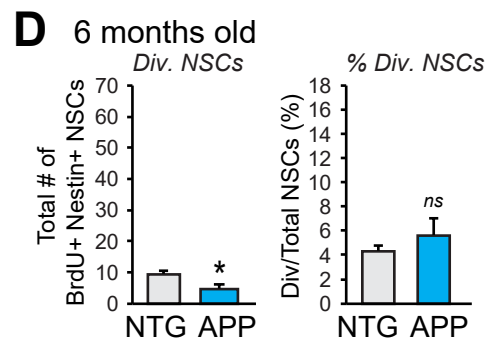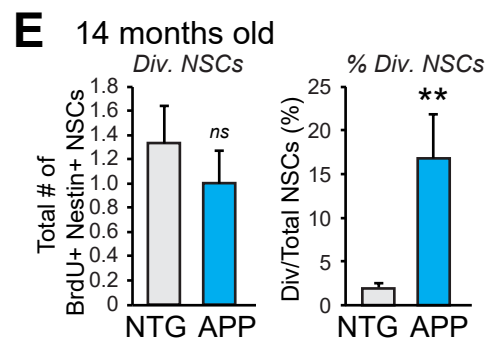

**Figure S5. APP mice exhibit altered NSC division at different ages. Related to Figure 2.**

(A-E) Neural stem cell (NSC) division is represented as total number of BrdU+ Nestin+ dividing NSCs (left), and as a percentage of dividing NSCs/total NSCs (right) in NTG and APP mice at 1 (A, n = 9-10 mice per genotype), 2 (B, n = 8 mice per genotype), 3 (C, n = 8 mice per genotype), 6 (D, n = 8 mice per genotype), and 14 (E, n = 11-12 mice per genotype) months of age.

\*p < 0.05; \*\*p < 0.01, \*\*\*p < 0.001, ns, not significant, two-tailed unpaired Student's t-test. Values indicate mean ± SEM.

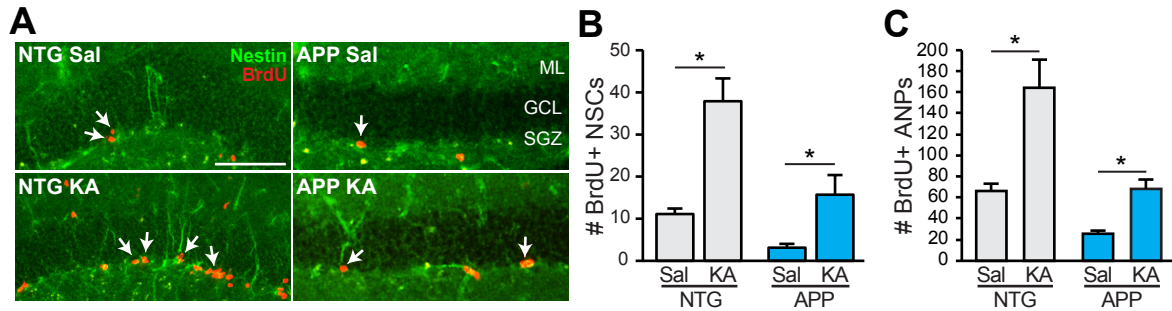

**Figure S6. Kainic acid seizures induce NSC division in NTG and APP mice. Related to Figures 2 and 3.**

(A) Representative images of Nestin/BrdU staining in 8-month-old NTG and APP mice that received intraperitoneal injection of saline or kainic acid (KA, 15 mg/kg). Scale bar, 100 $\mu$ m.

(B) Number of BrdU+ Nestin+ NSCs in the SGZ of NTG and APP mice injected with saline or kainic acid (n = 7-13 mice per genotype and treatment). Kruskal-Wallis test revealed significant differences between groups (p < 0.0001).

(C) Number of BrdU+ Nestin+ ANPs in the SGZ of NTG and APP mice injected with either saline or kainic acid (n = 7-13 mice per genotype and treatment). Kruskal-Wallis test revealed significant differences between groups (p < 0.0001).

\*p < 0.05, Dunn post-hoc test. Values indicate mean  $\pm$  SEM.

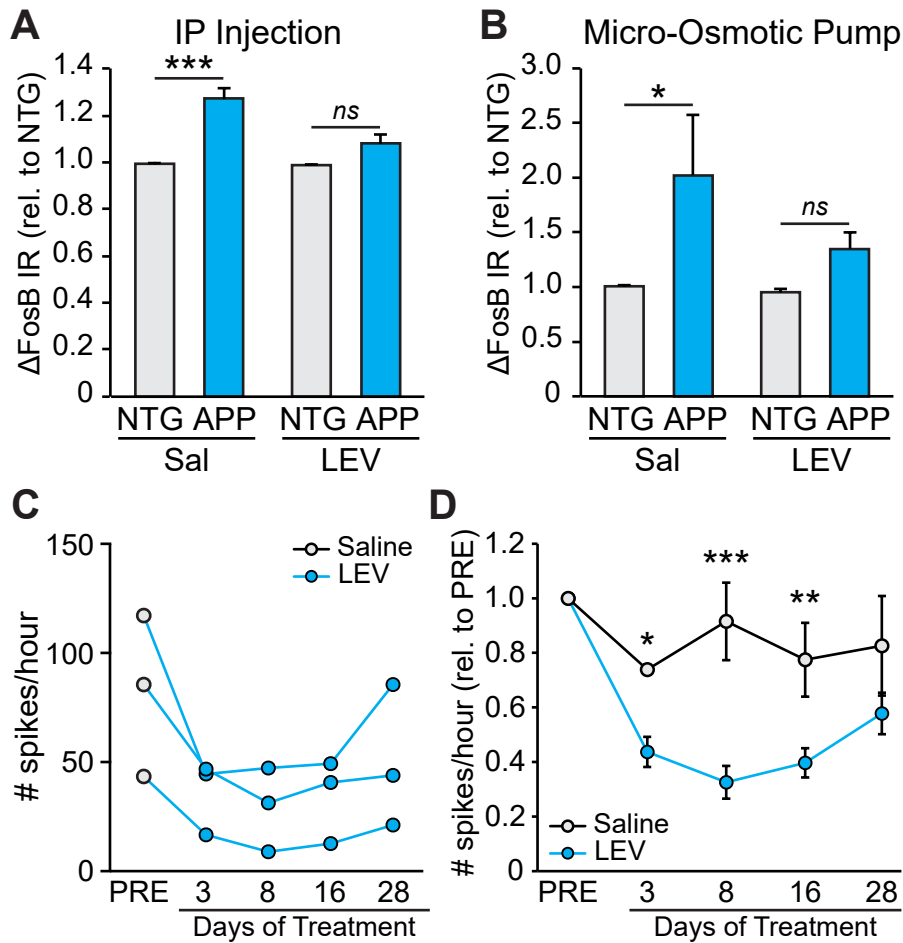

**Figure S7. Treatment of APP mice with the antiepileptic drug levetiracetam normalizes  $\Delta$ FosB, a seizure-induced transcription factor, and epileptic spikes. Related to Figures 4 and 5.**

(A) Mice in Figure 6 were injected with levetiracetam (LEV, 75 mg/kg, IP), or an equivalent volume of saline, 3 times a day for 2 weeks ( $n = 9-11$  mice per genotype/treatment), and then sacrificed and brains were processed for immunostaining.  $\Delta$ FosB immunoreactivity (IR) is increased in saline-treated APP mice compared with saline-treated NTG mice, but is normalized in LEV-treated APP mice compared to LEV-treated NTG mice. Two-way ANOVA revealed a significant effect of LEV treatment ( $p < 0.01$ ), genotype ( $p < 0.0001$ ), and an interaction between treatment and genotype ( $p < 0.01$ ).

(B) Mice in Figure 7 were implanted with Alzet micro-osmotic pumps designed to release either saline or 75 mg/kg/day of LEV for 28 days ( $n = 6-8$  mice per genotype/treatment). LEV delivered via micro-osmotic pumps similarly reduced  $\Delta$ FosB IR in APP mice. Two-way ANOVA revealed a significant effect of genotype ( $p < 0.05$ ).

\* $p < 0.05$ , \*\*\*\* $p < 0.0001$ , ns, not significant, Tukey post-hoc tests (A-B).

(C-D) Mice received implantation of chronic EEG electrodes, allowed to recover, and baseline EEG recordings were performed. Mice were then implanted with Alzet micro-osmotic pumps designed to release 75 mg/kg/day of LEV for 28 days. (C) Number of spikes exhibited by individual mice during baseline recordings, and then at 3, 8, 16, and 28 days of LEV treatment.

(D) Data in panel C was normalized to baseline spike frequency (blue circles), and plotted with data from mice that received saline-filled micro-osmotic pumps as controls (gray circles). Two-way repeated measures ANOVA revealed a significant effect of LEV treatment ( $p < 0.05$ ), and an interaction between treatment and time ( $p < 0.01$ ).

Holm-Sidak post-hoc tests indicated significant differences between saline and LEV groups at 3, 8, and 16 days of treatment.

\* $p < 0.05$ , \*\* $p < 0.01$ , \*\*\* $p < 0.001$ , ns, not significant. Values indicate mean  $\pm$  SEM.



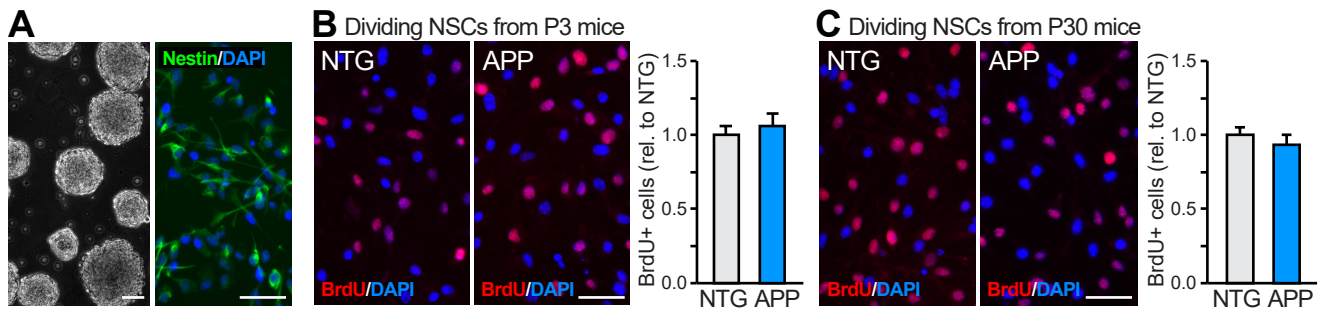

**Figure S8. NSCs division is similar in dissociated neurospheres from NTG and APP mice. Related to Figure 4.**

(A) Representative images of neurospheres grown in vitro from hippocampal NSCs (left) that can be dissociated, plated, and immunostained for nestin and DAPI to confirm their identity (right).

(B) Example images of BrdU+ NSCs generated from dissociated neurospheres originating from mice at postnatal day 3 (P3, left), with quantification (right; n = 3 mice per genotype).

(C) Example images of BrdU+ dividing NSCs generated from dissociated neurospheres originating from mice at postnatal day 30 (P30, left), with quantification (right; n = 4 mice per genotype).

Scale bars: (A) left, 100 $\mu$ m; right, 50 $\mu$ m. (B, C) 50 $\mu$ m. Two-tailed unpaired Student's t test. Values indicate mean  $\pm$  SEM.

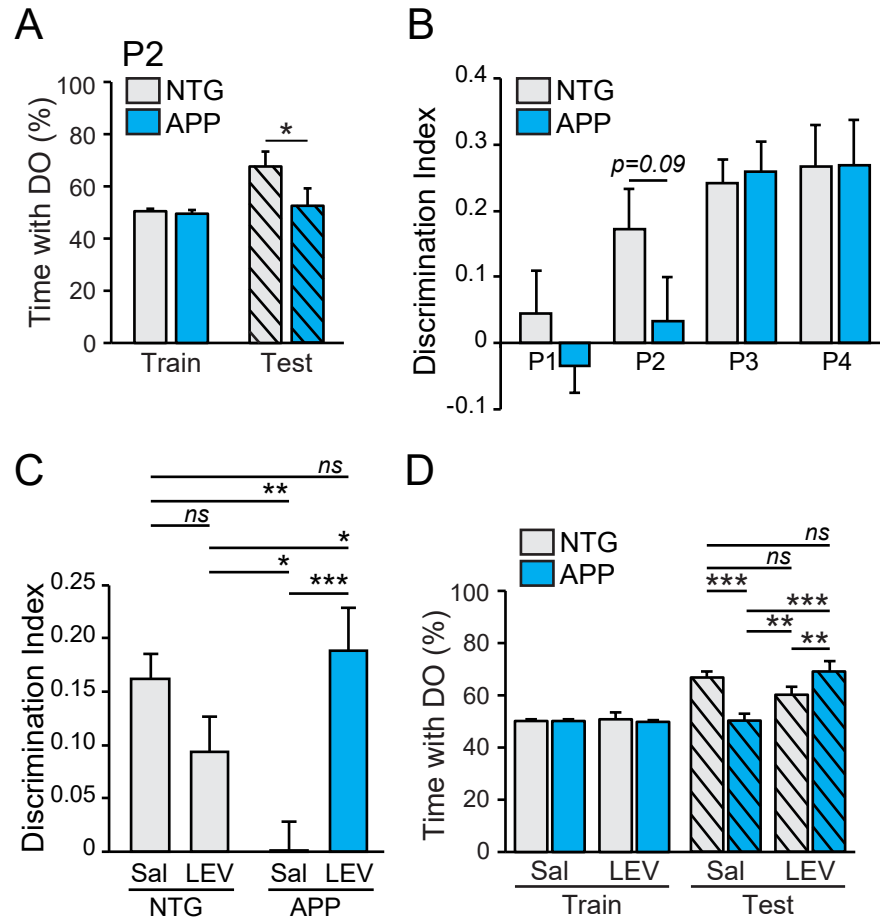

**Figure S9. Spatial discrimination index of NTG and APP mice. Related to Figure 5.**

(A-B) Additional analyses of data presented in Figure 5B.

(A) Comparison of spatial discrimination performance at position 2 in untreated NTG and APP mice.

Two-way ANOVA revealed a significant effect of test phase ( $p < 0.05$ ). \* $p < 0.05$ , Holm-Sidak post-hoc test. For simplicity, post-hoc comparisons for only the “Test” phase are indicated.

(B) Discrimination index was calculated as the difference between the percent of time spent with displaced object during the testing and training phases of the spatial discrimination task in untreated NTG and APP mice. Two-way ANOVA revealed a significant effect of object position ( $p < 0.0001$ ).  $p = 0.09$ , Fisher’s LSD post-hoc test.

(C-D) Additional analyses of data presented in Figure 5C.

(C) Discrimination index at position 2 in saline- or LEV-treated NTG and APP mice. Two-way ANOVA revealed a significant effect of LEV treatment ( $p < 0.05$ ) and an interaction between genotype and treatment ( $p < 0.001$ ). \* $p < 0.05$ , \*\* $p < 0.01$ , \*\*\* $p < 0.001$ , ns, not significant, Newman-Keuls post-hoc test.

(D) Comparison of spatial discrimination performance at position 2 in saline- or LEV-treated NTG and APP mice. Two-way ANOVA revealed a significant effect of LEV treatment ( $p < 0.001$ ), test phase ( $p < 0.0001$ ), and an interaction between treatment and test phase ( $p < 0.001$ ). \*\* $p < 0.01$ , \*\*\* $p < 0.001$ , ns, not significant, Holm-Sidak post-hoc test. For simplicity, post-hoc comparisons for only the “Test” phase are indicated.

Values indicate mean  $\pm$  SEM.

**Table S1. Raw values for normalized data in Figures 1-S8. Related to Figures 1-S8 and STAR Methods**

| Figure | Parameter                           | Groups                                                                                                                                     | Avg ± SEM                                                                                                                                                                 | Additional cohort                                                 | Unit                                                                                                                                                            |
|--------|-------------------------------------|--------------------------------------------------------------------------------------------------------------------------------------------|---------------------------------------------------------------------------------------------------------------------------------------------------------------------------|-------------------------------------------------------------------|-----------------------------------------------------------------------------------------------------------------------------------------------------------------|
| 1g     | DCX+ staining                       | NTG (1 mo)<br>APP (1 mo)                                                                                                                   | 148.39 ± 12.24<br>137.93 ± 24.23                                                                                                                                          |                                                                   | Sum of % threshold area covered by DCX expression in the granule cell layer in every 10 <sup>th</sup> section through the rostral-caudal extent of hippocampus. |
|        | DCX+ immature neurons               | NTG (2 mo)<br>APP (2 mo)<br>NTG (3 mo)<br>APP (3 mo)<br>NTG (7 mo)<br>APP (7 mo)<br>NTG (14 mo)<br>APP (14 mo)                             | 665.83 ± 45.79<br>903.50 ± 95.33<br>515.63 ± 17.18<br>394.63 ± 39.91<br>167.40 ± 14.57<br>54.67 ± 15.06<br>50.58 ± 3.19<br>19.36 ± 7.33                                   |                                                                   | Cell numbers                                                                                                                                                    |
| 2c     | Nestin+ NSCs                        | NTG (1 mo)<br>APP (1 mo)<br>NTG (2 mo)<br>APP (2 mo)<br>NTG (3 mo)<br>APP (3 mo)<br>NTG (6 mo)<br>APP (6 mo)<br>NTG (14 mo)<br>APP (14 mo) | 977.36 ± 38.86<br>910.67 ± 52.63<br>373.00 ± 28.36<br>144.83 ± 23.20<br>217.50 ± 9.65<br>124.63 ± 28.97<br>172.40 ± 13.72<br>85.22 ± 15.12<br>72.83 ± 3.91<br>9.45 ± 4.39 | 592.50 ± 49.18<br>411.88 ± 49.26                                  | Cell numbers                                                                                                                                                    |
| 2f     | Nestin+ BrdU+ NSCs                  | NTG (1 mo)<br>APP (1 mo)<br>NTG (2 mo)<br>APP (2 mo)<br>NTG (3 mo)<br>APP (3 mo)<br>NTG (6 mo)<br>APP (6 mo)<br>NTG (14 mo)<br>APP (14 mo) | 45.11 ± 3.32<br>58.10 ± 4.30<br>43.63 ± 2.76<br>45.25 ± 4.17<br>17.38 ± 1.59<br>11.50 ± 1.55<br>9.57 ± 1.13<br>4.88 ± 1.33<br>1.33 ± 0.31<br>1.00 ± 0.27                  |                                                                   | Cell numbers                                                                                                                                                    |
| 2i     | Nestin+ Ki67+ NSCs                  | NTG<br>APP                                                                                                                                 | 50.25 ± 4.26<br>57.13 ± 7.21                                                                                                                                              |                                                                   | Cell numbers                                                                                                                                                    |
| 3b, c  | BrdU+ EdU+ Nestin+ NSCs             | NTG (3 wk)<br>APP (3 wk)<br>NTG (2 mo)<br>APP (2 mo)<br>NTG (6 mo)<br>APP (6 mo)<br>NTG (12 mo)<br>APP (12 mo)                             | 39.83 ± 5.21<br>76.67 ± 13.70<br>18.25 ± 2.10<br>13.33 ± 2.82<br>3.43 ± 0.84<br>1.25 ± 0.49<br>3.33 ± 0.67<br>0.40 ± 0.24                                                 |                                                                   | Cell numbers                                                                                                                                                    |
| 4a     | Ki67+ Nestin+ NSCs/<br>Nestin+ NSCs | NTG sal<br>APP sal<br>NTG lev<br>APP lev                                                                                                   | 18.53 ± 2.15<br>30.68 ± 5.97<br>17.96 ± 2.04<br>26.04 ± 3.91                                                                                                              | 7.75 ± 1.25<br>18.22 ± 4.09<br>5.06 ± 1.25<br>7.83 ± 3.10         | % Cell numbers                                                                                                                                                  |
| 4b     | Nestin+ NSCs                        | NTG sal<br>APP sal<br>NTG lev<br>APP lev                                                                                                   | 484.50 ± 60.04<br>225.75 ± 45.75<br>494.60 ± 55.44<br>365.00 ± 57.04                                                                                                      | 186.2 ± 17.93<br>134 ± 18.87<br>173.33 ± 7.80<br>184.80 ± 25.70   | Cell numbers                                                                                                                                                    |
| 4c     | DCX+ staining                       | NTG sal<br>APP sal<br>NTG lev<br>APP lev                                                                                                   | 198.73 ± 7.23<br>259.61 ± 25.71<br>157.16 ± 22.38<br>132.59 ± 46.75                                                                                                       | 110.03 ± 8.28<br>181.82 ± 32.31<br>83.13 ± 4.31<br>116.29 ± 24.65 | Sum of % threshold area covered by DCX expression in the granule cell layer in every 10 <sup>th</sup> section through the rostral-caudal extent of hippocampus. |
| S1a    | DCX+ staining                       | NTG (1 mo)<br>APP (1 mo)                                                                                                                   | 148.39 ± 12.24<br>137.93 ± 24.23                                                                                                                                          |                                                                   | Sum of % threshold area covered by DCX expression in the granule                                                                                                |

|     |                            |                                                                                                                                            |                                                                                                                                                                             |                                                                  |                                                                                                |
|-----|----------------------------|--------------------------------------------------------------------------------------------------------------------------------------------|-----------------------------------------------------------------------------------------------------------------------------------------------------------------------------|------------------------------------------------------------------|------------------------------------------------------------------------------------------------|
|     |                            |                                                                                                                                            |                                                                                                                                                                             |                                                                  | cell layer in every 10 <sup>th</sup> section through the rostral-caudal extent of hippocampus. |
|     | DCX+ neuroblasts           | NTG (2 mo)<br>APP (2 mo)<br>NTG (3 mo)<br>APP (3 mo)<br>NTG (7 mo)<br>APP (7 mo)<br>NTG (14 mo)<br>APP (14 mo)                             | 992.50 ± 28.05<br>1058 ± 102.75<br>640.38 ± 14.36<br>402.25 ± 11.91<br>506.90 ± 53.50<br>199.56 ± 37.43<br>56.58 ± 4.00<br>25.55 ± 4.99                                     |                                                                  | Cell numbers                                                                                   |
| S1b | Nestin+ ANPs               | NTG (1 mo)<br>APP (1 mo)<br>NTG (2 mo)<br>APP (2 mo)<br>NTG (3 mo)<br>APP (3 mo)<br>NTG (6 mo)<br>APP (6 mo)<br>NTG (14 mo)<br>APP (14 mo) | 853.36 ± 43.08<br>836.44 ± 57.67<br>567.00 ± 38.86<br>427.17 ± 21.51<br>225.75 ± 27.21<br>145.5 ± 22.09<br>208.40 ± 12.05<br>152.89 ± 12.17<br>68.67 ± 6.12<br>23.64 ± 4.68 | 463.63 ± 34.93<br>361.75 ± 44.07                                 | Cell numbers                                                                                   |
| S1c | Nestin+ BrdU+ ANPs         | NTG (1 mo)<br>APP (1 mo)<br>NTG (2 mo)<br>APP (2 mo)<br>NTG (3 mo)<br>APP (3 mo)<br>NTG (6 mo)<br>APP (6 mo)<br>NTG (14 mo)<br>APP (14 mo) | 137.67 ± 8.42<br>157.5 ± 10.29<br>99.50 ± 6.58<br>103 ± 11.31<br>59.50 ± 4.19<br>42.00 ± 4.09<br>42.71 ± 5.69<br>26.25 ± 4.58<br>9.58 ± 1.78<br>4.64 ± 1.08                 |                                                                  | Cell numbers                                                                                   |
| S3a | DCX+ immature neurons      | NTG<br>PSAPP                                                                                                                               | 163.91 ± 15.82<br>241.89 ± 40.51                                                                                                                                            |                                                                  | Cell numbers                                                                                   |
| S3b | DCX+ immature neurons      | NTG<br>PSAPP                                                                                                                               | 32.45 ± 6.56<br>16.33 ± 4.13                                                                                                                                                |                                                                  | Cell numbers                                                                                   |
| S3c | DCX+ immature neurons      | NTG<br>Tg2576                                                                                                                              | 53.09 ± 6.14<br>30.80 ± 6.82                                                                                                                                                |                                                                  | Cell numbers                                                                                   |
| S3d | Nestin+ NSCs               | NTG<br>PSAPP                                                                                                                               | 159.09 ± 11.83<br>116.22 ± 25.10                                                                                                                                            |                                                                  | Cell numbers                                                                                   |
| S3e | Nestin+ NSCs               | NTG<br>PSAPP                                                                                                                               | 71 ± 12.06<br>41.75 ± 6.10                                                                                                                                                  |                                                                  | Cell numbers                                                                                   |
| S3f | Nestin+ NSCs               | NTG<br>Tg2576                                                                                                                              | 103.50 ± 6.95<br>29.78 ± 3.79                                                                                                                                               |                                                                  | Cell numbers                                                                                   |
| S4c | Prox1+ hilar granule cells | NTG<br>APP                                                                                                                                 | 83.50 ± 7.22<br>165.86 ± 29.57                                                                                                                                              |                                                                  | Cell numbers                                                                                   |
| S7a | ΔFosB IR                   | NTG sal<br>APP sal<br>NTG LEV<br>APP LEV                                                                                                   | 1.109 ± 0.007<br>1.426 ± 0.088<br>1.102 ± 0.004<br>1.240 ± 0.059                                                                                                            | 1.075 ± 0.004<br>1.366 ± 0.066<br>1.072 ± 0.003<br>1.102 ± 0.020 | Arbitrary units (intensity)                                                                    |
| S7b | ΔFosB IR                   | NTG sal<br>APP sal<br>NTG LEV<br>APP LEV                                                                                                   | 1.682 ± 0.022<br>4.881 ± 1.448<br>1.434 ± 0.045<br>2.860 ± 0.549                                                                                                            | 1.047 ± 0.003<br>1.186 ± 0.107<br>1.051 ± 0.005<br>1.187 ± 0.061 | Arbitrary units (intensity)                                                                    |
| S8b | BrdU+ cells                | NTG<br>APP                                                                                                                                 | 41.60 ± 2.45<br>44.12 ± 3.66                                                                                                                                                |                                                                  | Cell numbers                                                                                   |
| S8c | BrdU+ cells                | NTG<br>APP                                                                                                                                 | 52.94 ± 2.84<br>49.34 ± 3.66                                                                                                                                                |                                                                  | Cell numbers                                                                                   |

**Table S2. Statistical values for comparisons in Figures 1-S9. Related to Figures 1-S9 and STAR Methods.**

| Figure | Parameter                           | Groups                                                                                                                     | Test used                | Values                                                                                                                  | P value                                                                                      |
|--------|-------------------------------------|----------------------------------------------------------------------------------------------------------------------------|--------------------------|-------------------------------------------------------------------------------------------------------------------------|----------------------------------------------------------------------------------------------|
| 1d     | Spikes per hour                     | NTG, APP (1 mo)<br>NTG, APP (2 mo)<br>NTG, APP (4-6 mo)                                                                    | Student t-test, 2-tailed | $t_6 = 2.514$<br>$t_4 = 4.209$<br>$t_6 = 3.879$                                                                         | $P = 0.0456$<br>$P = 0.0136$<br>$P = 0.0082$                                                 |
| 1g     | DCX+ staining                       | NTG, APP (1 mo)                                                                                                            | Student t-test, 2-tailed | $t_{19} = 0.4153$                                                                                                       | $P = 0.6826$                                                                                 |
|        | DCX+ immature neurons               | NTG, APP (2 mo)<br>NTG, APP (3 mo)<br>NTG, APP (7 mo)<br>NTG, APP (14 mo)                                                  | Student t-test, 2-tailed | $t_{10} = 2.247$<br>$t_{14} = 2.785$<br>$t_{17} = 5.374$<br>$t_{21} = 4.024$                                            | $P = 0.0484$<br>$P = 0.0146$<br>$P < 0.0001$<br>$P = 0.0006$                                 |
| 2c     | Nestin+ NSCs                        | NTG, APP (1 mo)<br>NTG, APP (2 mo)<br>NTG, APP (3 mo)<br>NTG, APP (7 mo)<br>NTG, APP (14 mo)                               | Student t-test, 2-tailed | $t_{18} = 1.011$<br>$t_{26} = 5.002$<br>$t_{14} = 3.041$<br>$t_{17} = 3.399$<br>$t_{21} = 10.81$                        | $P = 0.3254$<br>$P < 0.0001$<br>$P = 0.0088$<br>$P = 0.0034$<br>$P < 0.0001$                 |
|        |                                     | NTG, APP (1 mo)<br>NTG, APP (2 mo)<br>NTG, APP (3 mo)<br>NTG, APP (7 mo)<br>NTG, APP (14 mo)                               | Student t-test, 2-tailed | $t_{17} = 2.353$<br>$t_{14} = 0.3248$<br>$t_{14} = 2.647$<br>$t_{13} = 2.649$<br>$t_{21} = 0.8050$                      | $P = 0.0309$<br>$P = 0.7501$<br>$P = 0.0191$<br>$P = 0.0201$<br>$P = 0.4299$                 |
| 2f     | Nestin+ BrdU+ NSCs                  | NTG, APP (1 mo)<br>NTG, APP (2 mo)<br>NTG, APP (3 mo)<br>NTG, APP (7 mo)<br>NTG, APP (14 mo)                               | Student t-test, 2-tailed | $t_{17} = 2.353$<br>$t_{14} = 0.3248$<br>$t_{14} = 2.647$<br>$t_{13} = 2.649$<br>$t_{21} = 0.8050$                      | $P = 0.0309$<br>$P = 0.7501$<br>$P = 0.0191$<br>$P = 0.0201$<br>$P = 0.4299$                 |
|        | BrdU+ Nestin+ NSCs/<br>Nestin+ NSCs | NTG, APP (2 mo, inset)                                                                                                     | Student t-test, 2-tailed | $t_{14} = 2.925$                                                                                                        | $P = 0.0111$                                                                                 |
| 2i     | Nestin+ Ki67+ NSCs                  | NTG, APP                                                                                                                   | Student t-test, 2-tailed | $t_{14} = 0.8213$                                                                                                       | $P = 0.4253$                                                                                 |
|        | Ki67+ Nestin+ NSCs/<br>Nestin+ NSCs | NTG, APP                                                                                                                   | Student t-test, 2-tailed | $t_{14} = 2.141$                                                                                                        | $P = 0.0504$                                                                                 |
| 3b, c  | BrdU+ EdU+ Nestin+ NSCs             | NTG, APP (3 wk)<br>NTG, APP (2 mo)<br>NTG, APP (6 mo)<br>NTG, APP (12 mo)                                                  | Student t-test, 2-tailed | $t_{10} = 2.514$<br>$t_{12} = 1.429$<br>$t_{13} = 2.309$<br>$t_{12} = 3.162$                                            | $P = 0.0307$<br>$P = 0.1784$<br>$P = 0.0380$<br>$P = 0.0082$                                 |
| 4a     | Ki67+ Nestin+ NSCs/<br>Nestin+ NSCs | NTG, APP (saline)<br>NTG, APP (LEV)                                                                                        | 2-way ANOVA              | Genotype, $F_{1,35} = 8.785$<br>Treatment, $F_{1,35} = 6.929$<br>Interaction, $F_{1,35} = 3.095$                        | $P = 0.0054$<br>$P = 0.0125$<br>$P = 0.0873$                                                 |
|        |                                     | NTG sal v NTG LEV<br>NTG sal v APP sal<br>NTG sal v APP LEV<br>NTG LEV v APP sal<br>NTG LEV v APP LEV<br>APP sal v APP LEV | Holm-Sidak post-hoc      | $t_{35} = 0.6278$<br>$t_{35} = 3.397$<br>$t_{35} = 0.2205$<br>$t_{35} = 4.242$<br>$t_{35} = 0.8379$<br>$t_{35} = 3.055$ | $P = 0.7923$<br>$P = 0.0085$<br>$P = 0.8267$<br>$P = 0.0009$<br>$P = 0.7923$<br>$P = 0.0170$ |
| 4b     | Nestin+ NSCs                        | NTG, APP (saline)<br>NTG, APP (LEV)                                                                                        | 2-way ANOVA              | Genotype, $F_{1,35} = 7.003$<br>Treatment, $F_{1,35} = 2.925$<br>Interaction, $F_{1,35} = 4.273$                        | $P = 0.0121$<br>$P = 0.0961$<br>$P = 0.0462$                                                 |
|        |                                     | NTG sal v NTG LEV<br>NTG sal v APP sal<br>NTG sal v APP LEV<br>NTG LEV v APP sal<br>NTG LEV v APP LEV<br>APP sal v APP LEV | Holm-Sidak post-hoc      | $t_{35} = 0.2567$<br>$t_{35} = 3.390$<br>$t_{35} = 0.6227$<br>$t_{35} = 3.303$<br>$t_{35} = 0.4029$<br>$t_{35} = 2.628$ | $P = 0.9036$<br>$P = 0.0104$<br>$P = 0.9011$<br>$P = 0.0110$<br>$P = 0.9036$<br>$P = 0.0497$ |
| 4c     | DCX+ staining                       | NTG, APP (saline)<br>NTG, APP (LEV)                                                                                        | 2-way ANOVA              | Genotype, $F_{1,35} = 2.658$<br>Treatment, $F_{1,35} = 19.77$<br>Interaction, $F_{1,35} = 6.738$                        | $P = 0.1120$<br>$P < 0.0001$<br>$P = 0.0137$                                                 |
|        |                                     | NTG sal v NTG LEV<br>NTG sal v APP sal<br>NTG sal v APP LEV<br>NTG LEV v APP sal<br>NTG LEV v APP LEV<br>APP sal v APP LEV | Holm-Sidak post-hoc      | $t_{35} = 1.331$<br>$t_{35} = 3.039$<br>$t_{35} = 1.873$<br>$t_{35} = 4.606$<br>$t_{35} = 0.6716$<br>$t_{35} = 4.899$   | $P = 0.3470$<br>$P = 0.0177$<br>$P = 0.1942$<br>$P = 0.0003$<br>$P = 0.5063$<br>$P = 0.0001$ |
| 5b     | Time spent with DO                  | NTG (P1, P2, P3, P4)                                                                                                       | 2-way RM ANOVA           | Position, $F_{3,26} = 0.7074$<br>Test phase, $F_{1,26} = 38.39$<br>Interaction, $F_{3,26} = 2.992$                      | $P = 0.5563$<br>$P < 0.0001$<br>$P = 0.0492$                                                 |
|        |                                     | NTG P1 train v test                                                                                                        | Holm-Sidak post-hoc      | $t_{26} = 0.7706$                                                                                                       | $P = 0.4479$                                                                                 |

|     |                                     |                                                                                              |                          |                                                                                                    |                                                                              |
|-----|-------------------------------------|----------------------------------------------------------------------------------------------|--------------------------|----------------------------------------------------------------------------------------------------|------------------------------------------------------------------------------|
|     |                                     | NTG P2 train v test<br>NTG P3 train v test<br>NTG P4 train v test                            |                          | $t_{26} = 3.049$<br>$t_{26} = 3.990$<br>$t_{26} = 4.436$                                           | $P = 0.0104$<br>$P = 0.0014$<br>$P = 0.0006$                                 |
|     |                                     | APP (P1, P2, P3, P4)                                                                         | 2-way RM ANOVA           | Position, $F_{3,23} = 7.271$<br>Test phase, $F_{1,23} = 21.95$<br>Interaction, $F_{3,23} = 7.783$  | $P = 0.0013$<br>$P = 0.0001$<br>$P = 0.0009$                                 |
|     |                                     | APP P1 train v test<br>APP P2 train v test<br>APP P3 train v test<br>APP P4 train v test     | Holm-Sidak post-hoc      | $t_{23} = 0.6623$<br>$t_{23} = 00.5999$<br>$t_{23} = 04.730$<br>$t_{23} = 04.533$                  | $P = 0.7641$<br>$P = 0.7641$<br>$P = 0.0004$<br>$P = 0.0004$                 |
| 5c  | Time spent with DO                  | NTG, APP (saline)<br>NTG, APP (LEV)                                                          | 2-way RM ANOVA           | Treatment, $F_{3,26} = 8.161$<br>Test phase, $F_{1,26} = 59.59$<br>Interaction, $F_{3,26} = 8.261$ | $P = 0.0005$<br>$P < 0.0001$<br>$P = 0.0005$                                 |
|     |                                     | NTG sal train v test<br>NTG LEV train v test<br>APP sal train v test<br>APP LEV train v test | Holm-Sidak post-hoc      | $t_{26} = 5.593$<br>$t_{26} = 3.250$<br>$t_{26} = 0.02989$<br>$t_{26} = 7.192$                     | $P < 0.0001$<br>$P = 0.0064$<br>$P = 0.9764$<br>$P < 0.0001$                 |
| S1a | DCX+ staining                       | NTG, APP (1 mo)                                                                              | Student t-test, 2-tailed | $t_{19} = 0.4153$                                                                                  | $P = 0.6826$                                                                 |
|     | DCX+ neuroblasts                    | NTG, APP (2 mo)<br>NTG, APP (3 mo)<br>NTG, APP (7 mo)<br>NTG, APP (14 mo)                    | Student t-test, 2-tailed | $t_{10} = 0.6150$<br>$t_{14} = 12.76$<br>$t_{17} = 4.606$<br>$t_{21} = 4.892$                      | $P = 0.5523$<br>$P < 0.0001$<br>$P = 0.0003$<br>$P < 0.0001$                 |
| S1b | Nestin+ ANPs                        | NTG, APP (1 mo)<br>NTG, APP (2 mo)<br>NTG, APP (3 mo)<br>NTG, APP (7 mo)<br>NTG, APP (14 mo) | Student t-test, 2-tailed | $t_{18} = 0.2284$<br>$t_{26} = 3.104$<br>$t_{14} = 2.290$<br>$t_{17} = 3.233$<br>$t_{21} = 5.764$  | $P = 0.8219$<br>$P = 0.0046$<br>$P = 0.0381$<br>$P = 0.0049$<br>$P < 0.0001$ |
| S1c | Nestin+ BrdU+ ANPs                  | NTG, APP (1 mo)<br>NTG, APP (2 mo)<br>NTG, APP (3 mo)<br>NTG, APP (7 mo)<br>NTG, APP (14 mo) | Student t-test, 2-tailed | $t_{17} = 1.471$<br>$t_{14} = 0.2674$<br>$t_{14} = 2.987$<br>$t_{13} = 2.278$<br>$t_{21} = 2.321$  | $P = 0.1596$<br>$P = 0.7931$<br>$P = 0.0098$<br>$P = 0.0403$<br>$P = 0.0304$ |
| S3a | DCX+ immature neurons               | NTG, PSAPP                                                                                   | Student t-test, 1-tailed | $t_{18} = 2.022$                                                                                   | $P = 0.0292$                                                                 |
| S3b | DCX+ immature neurons               | NTG, PSAPP                                                                                   | Student t-test, 1-tailed | $t_{20} = 1.921$                                                                                   | $P = 0.0346$                                                                 |
| S3c | DCX+ immature neurons               | NTG, Tg2576                                                                                  | Student t-test, 1-tailed | $t_{19} = 2.382$                                                                                   | $P = 0.0139$                                                                 |
| S3d | Nestin+ NSCs                        | NTG, PSAPP                                                                                   | Student t-test, 1-tailed | $t_{18} = 1.642$                                                                                   | $P = 0.0590$                                                                 |
| S3e | Nestin+ NSCs                        | NTG, PSAPP                                                                                   | Student t-test, 1-tailed | $t_{21} = 2.221$                                                                                   | $P = 0.0187$                                                                 |
| S3f | Nestin+ NSCs                        | NTG, Tg2576                                                                                  | Student t-test, 1-tailed | $t_{18} = 8.863$                                                                                   | $P < 0.0001$                                                                 |
| S4c | Prox1+ hilar granule cells          | NTG, APP                                                                                     | Student t-test, 2-tailed | $t_{15} = 3.181$                                                                                   | $P = 0.0062$                                                                 |
| S5a | Nestin+ BrdU+ NSCs                  | NTG, APP                                                                                     | Student t-test, 2-tailed | $t_{17} = 2.353$                                                                                   | $P = 0.0309$                                                                 |
|     | BrdU+ Nestin+ NSCs/<br>Nestin+ NSCs | NTG, APP                                                                                     | Student t-test, 2-tailed | $t_{17} = 4.250$                                                                                   | $P = 0.0005$                                                                 |
| S5b | Nestin+ BrdU+ NSCs                  | NTG, APP                                                                                     | Student t-test, 2-tailed | $t_{14} = 0.3248$                                                                                  | $P = 0.7501$                                                                 |
|     | BrdU+ Nestin+ NSCs/<br>Nestin+ NSCs | NTG, APP                                                                                     | Student t-test, 2-tailed | $t_{14} = 2.925$                                                                                   | $P = 0.0111$                                                                 |
| S5c | Nestin+ BrdU+ NSCs                  | NTG, APP                                                                                     | Student t-test, 2-tailed | $t_{14} = 2.647$                                                                                   | $P = 0.0191$                                                                 |
|     | BrdU+ Nestin+ NSCs/<br>Nestin+ NSCs | NTG, APP                                                                                     | Student t-test, 2-tailed | $t_{14} = 1.766$                                                                                   | $P = 0.0991$                                                                 |
| S5d | Nestin+ BrdU+ NSCs                  | NTG, APP                                                                                     | Student t-test, 2-tailed | $t_{13} = 2.649$                                                                                   | $P = 0.0201$                                                                 |
|     | BrdU+ Nestin+ NSCs/<br>Nestin+ NSCs | NTG, APP                                                                                     | Student t-test, 2-tailed | $t_{13} = 0.8650$                                                                                  | $P = 0.4027$                                                                 |
| S5e | Nestin+ BrdU+ NSCs                  | NTG, APP                                                                                     | Student t-test, 2-tailed | $t_{21} = 0.8050$                                                                                  | $P = 0.4299$                                                                 |
|     | BrdU+ Nestin+ NSCs/<br>Nestin+ NSCs | NTG, APP                                                                                     | Student t-test, 2-tailed | $t_{21} = 3.049$                                                                                   | $P = 0.0061$                                                                 |
| S6b | BrdU+ Nestin+ NSCs/<br>Nestin+ NSCs | NTG, APP (saline)<br>NTG, APP (KA)                                                           | Kruskal-Wallis test      | KW statistic = 26.70                                                                               | $P < 0.0001$                                                                 |

|     |                                     |                                                                                                                                                                                                                                                                                                                                                    |                          |                                                                                                    |                                                                                                                                                                      |
|-----|-------------------------------------|----------------------------------------------------------------------------------------------------------------------------------------------------------------------------------------------------------------------------------------------------------------------------------------------------------------------------------------------------|--------------------------|----------------------------------------------------------------------------------------------------|----------------------------------------------------------------------------------------------------------------------------------------------------------------------|
|     |                                     | NTG saline v KA<br>APP saline v KA                                                                                                                                                                                                                                                                                                                 | Dunn post-hoc            | Z = 2.795<br>Z = 2.391                                                                             | P = 0.0104<br>P = 0.0336                                                                                                                                             |
| S6c | BrdU+ Nestin+ ANPs/<br>Nestin+ ANPs | NTG, APP (saline)<br>NTG, APP (KA)                                                                                                                                                                                                                                                                                                                 | Kruskal-Wallis test      | KW statistic = 27.86                                                                               | P < 0.0001                                                                                                                                                           |
|     |                                     | NTG saline v KA<br>APP saline v KA                                                                                                                                                                                                                                                                                                                 | Dunn post-hoc            | Z = 2.651<br>Z = 2.375                                                                             | P = 0.0161<br>P = 0.0351                                                                                                                                             |
| S7a | $\Delta$ FosB IR                    | NTG, APP (saline)<br>NTG, APP (LEV)                                                                                                                                                                                                                                                                                                                | 2-way ANOVA              | Genotype, $F_{1,35} = 35.61$<br>Treatment, $F_{1,35} = 10.49$<br>Interaction, $F_{1,35} = 9.472$   | P < 0.0001<br>P = 0.0026<br>P = 0.0040                                                                                                                               |
|     |                                     | NTG sal v APP sal<br>NTG LEV v APP LEV                                                                                                                                                                                                                                                                                                             | Tukey post-hoc           |                                                                                                    | P < 0.0001<br>P = 0.2037                                                                                                                                             |
| S7b | $\Delta$ FosB IR                    | NTG, APP (saline)<br>NTG, APP (LEV)                                                                                                                                                                                                                                                                                                                | 2-way ANOVA              | Genotype, $F_{1,26} = 9.096$<br>Treatment, $F_{1,26} = 2.391$<br>Interaction, $F_{1,26} = 1.729$   | P = 0.0057<br>P = 0.1341<br>P = 0.2001                                                                                                                               |
|     |                                     | NTG sal v APP sal<br>NTG LEV v APP LEV                                                                                                                                                                                                                                                                                                             | Tukey post-hoc           |                                                                                                    | P = 0.0316<br>P = 0.6005                                                                                                                                             |
| S7d | Spike per hour                      | Sal (pre, 3d, 8d, 16d)<br>LEV (pre, 3d, 8d, 16d)                                                                                                                                                                                                                                                                                                   | 2-way ANOVA              | Time, $F_{3,12} = 18.51$<br>Treatment, $F_{1,4} = 18.58$<br>Interaction, $F_{3,12} = 6.774$        | P < 0.0001<br>P = 0.0125<br>P = 0.0063                                                                                                                               |
|     |                                     | Sal (pre) v LEV (pre)<br>Sal (3d) v LEV (3d)<br>Sal (8d) v LEV (8d)<br>Sal (16d) v LEV (16d)                                                                                                                                                                                                                                                       | Holm-Sidak post-hoc      | $t_{16} = 0.000$<br>$t_{16} = 2.744$<br>$t_{16} = 5.377$<br>$t_{16} = 3.456$                       | P > 0.9999<br>P = 0.0286<br>P = 0.0002<br>P = 0.0097                                                                                                                 |
| S8b | BrdU+ cells                         | NTG, APP                                                                                                                                                                                                                                                                                                                                           | Student t-test, 2-tailed | $t_4 = 0.5571$                                                                                     | P = 0.6072                                                                                                                                                           |
| S8c | BrdU+ cells                         | NTG, APP                                                                                                                                                                                                                                                                                                                                           | Student t-test, 2-tailed | $t_6 = 0.7937$                                                                                     | P = 0.4576                                                                                                                                                           |
| S9a | Discrimination index                | NTG (P1, P2, P3, P4)<br>APP (P1, P2, P3, P4)                                                                                                                                                                                                                                                                                                       | 2-way ANOVA              | Genotype, $F_{1,49} = 1.496$<br>Position, $F_{3,49} = 9.605$<br>Interaction, $F_{3,49} = 0.8249$   | P = 0.2272<br>P < 0.0001<br>P = 0.4865                                                                                                                               |
|     |                                     | NTG v APP (P1)<br>NTG v APP (P2)<br>NTG v APP (P3)<br>NTG v APP (P4)                                                                                                                                                                                                                                                                               | Fisher's LSD post-hoc    | $t_{49} = 1.008$<br>$t_{49} = 1.757$<br>$t_{49} = 0.2310$<br>$t_{49} = 0.01285$                    | P = 0.3184<br>P = 0.0851<br>P = 0.8183<br>P = 0.9898                                                                                                                 |
| S9b | Time spent with DO                  | NTG, APP                                                                                                                                                                                                                                                                                                                                           | 2-way ANOVA              | Genotype, $F_{1,13} = 3.357$<br>Test phase, $F_{1,13} = 5.206$<br>Interaction, $F_{1,13} = 2.399$  | P = 0.0899<br>P = 0.0400<br>P = 0.1454                                                                                                                               |
|     |                                     | NTG v APP (train)<br>NTG v APP (test)                                                                                                                                                                                                                                                                                                              | Holm-Sidak post-hoc      | $t_{26} = 0.1697$<br>$t_{26} = 2.388$                                                              | P = 0.8665<br>P = 0.0484                                                                                                                                             |
| S9c | Discrimination index                | NTG, APP (saline)<br>NTG, APP (LEV)                                                                                                                                                                                                                                                                                                                | 2-way ANOVA              | Genotype, $F_{1,26} = 0.6029$<br>Treatment, $F_{1,26} = 5.350$<br>Interaction, $F_{1,26} = 20.83$  | P = 0.4445<br>P = 0.0289<br>P = 0.0001                                                                                                                               |
|     |                                     | NTG sal v NTG LEV<br>NTG sal v APP sal<br>NTG sal v APP LEV<br>NTG LEV v APP sal<br>NTG LEV v APP LEV<br>APP sal v APP LEV                                                                                                                                                                                                                         | Newman-Keuls<br>post-hoc |                                                                                                    | ns<br>P < 0.01<br>ns<br>P < 0.05<br>P < 0.05<br>P < 0.001                                                                                                            |
| S9d | Time spent with DO                  | NTG, APP (saline)<br>NTG, APP (LEV)                                                                                                                                                                                                                                                                                                                | 2-way RM ANOVA           | Treatment, $F_{3,26} = 8.161$<br>Test phase, $F_{1,26} = 59.59$<br>Interaction, $F_{3,26} = 8.261$ | P = 0.0005<br>P < 0.0001<br>P = 0.0005                                                                                                                               |
|     |                                     | NTG sal v NTG LEV (train)<br>NTG sal v APP sal (train)<br>NTG sal v APP LEV (train)<br>NTG LEV v APP sal (train)<br>NTG LEV v APP LEV (train)<br>APP sal v APP LEV (train)<br>NTG sal v NTG LEV (test)<br>NTG sal v APP sal (test)<br>NTG sal v APP LEV (test)<br>NTG LEV v APP sal (test)<br>NTG LEV v APP LEV (test)<br>APP sal v APP LEV (test) | Newman-Keuls<br>post-hoc |                                                                                                    | P > 0.9999<br>P > 0.9999<br>P > 0.9999<br>P > 0.9999<br>P > 0.9999<br>P > 0.9999<br>P = 0.0600<br>P < 0.0001<br>P = 0.1300<br>P = 0.0082<br>P = 0.0017<br>P < 0.0001 |
